# Supplementary material
Source: MDPI journal article supplement (https://www.mdpi.com/2624-5175/5/3/27)
Supplement: s1 [file s1]

## Supplemental Materials

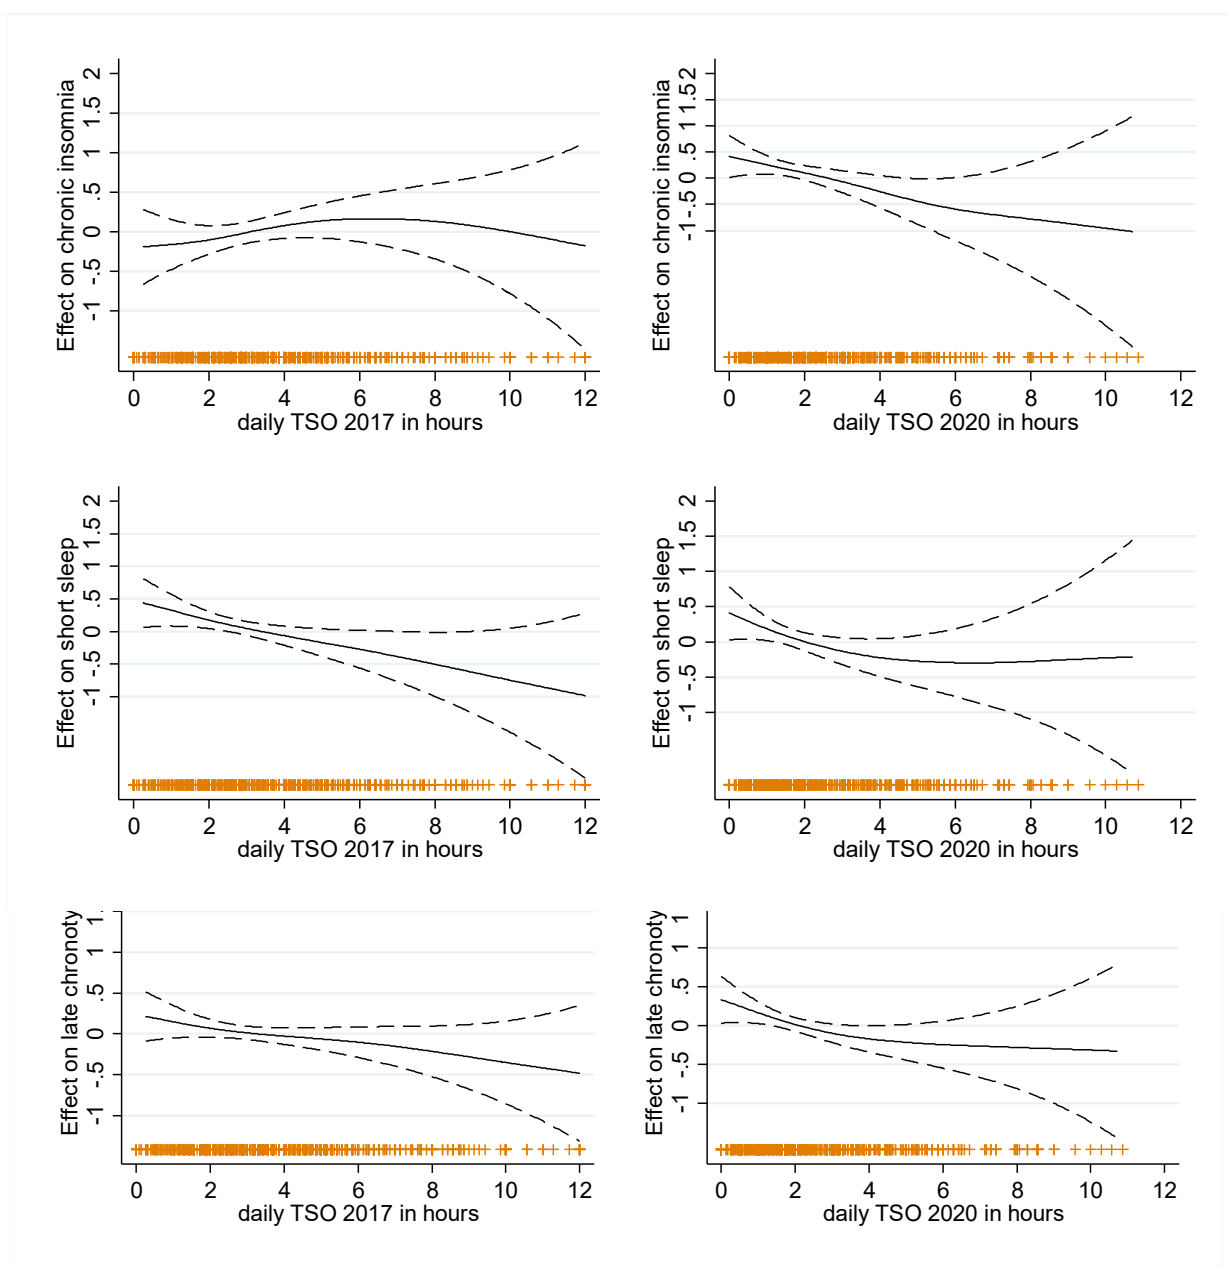

**Supplemental Figure S1.** Multivariable adjusted general additive models (GAM) splines (smooth function) for the association of time spent outdoors (hours/day) and sleep outcomes in the 2017 and 2020 survey.

**Supplemental Table S1.** Association of time spent outdoors (TSO) in quintiles (hours/day) and prevalence of adverse sleep outcomes in 2017

|                                                          | TSOq1<br>0-1.74h | TSOq2<br>1.75-2.71h         | TSOq3<br>2.72-3.71h         | TSOq4<br>3.72-5.11h         | TSOq5<br>5.12-12h           |
|----------------------------------------------------------|------------------|-----------------------------|-----------------------------|-----------------------------|-----------------------------|
| N (n%)                                                   | 203<br>[20.5%]   | 194<br>[19.6%]              | 209<br>[21.1%]              | 187<br>[18.8%]              | 198<br>[20.0%]              |
| <b>Chronic Insomnia</b>                                  |                  |                             |                             |                             |                             |
| N (n%)                                                   | 23<br>[11.3%]    | 11<br>[5.7%]                | 26<br>[12.4%]               | 25<br>[13.4%]               | 24<br>[12.1%]               |
| Age adjusted<br>OR (95%CI)                               | 1                | <b>0.46</b><br>[0.22, 0.98] | 1.10<br>[0.60, 2.00]        | 1.18<br>[0.64, 2.17]        | 1.05<br>[0.57, 1.94]        |
| MV adjusted<br>OR (95%CI)                                | 1                | <b>0.45</b><br>[0.21, 0.97] | 1.15<br>[0.62, 2.14]        | 1.14<br>[0.61, 2.14]        | 1.01<br>[0.54, 1.89]        |
| MV adjusted+ <b>opt.</b> +<br><b>happy</b><br>OR (95%CI) | 1                | 0.55<br>[0.25, 1.22]        | 1.56<br>[0.81, 3.02]        | 1.51<br>[0.78, 2.93]        | 1.44<br>[0.73, 2.82]        |
| MV adjusted+ <b>activity</b><br>OR (95%CI)               | 1                | <b>0.45</b><br>[0.21, 0.97] | 1.12<br>[0.60, 2.09]        | 1.06<br>[0.56, 2.01]        | 0.92<br>[0.48, 1.76]        |
| MV adjusted+ <b>health</b><br>OR (95%CI)                 | 1                | 0.58<br>[0.25, 1.33]        | 1.55<br>[0.79, 3.06]        | 1.73<br>[0.87, 3.46]        | 1.60<br>[0.80, 3.21]        |
| <b>Short sleep</b>                                       |                  |                             |                             |                             |                             |
| N* (%)                                                   | 45<br>[22.2%]    | 28<br>[14.4%]               | 34<br>[16.3%]               | 28<br>[15.0%]               | 23<br>[11.6%]               |
| Age adjusted<br>OR (95%CI)                               | 1                | <b>0.57</b><br>[0.34, 0.97] | <b>0.67</b><br>[0.41, 1.09] | <b>0.60</b><br>[0.35, 1.01] | <b>0.44</b><br>[0.25, 0.76] |
| MV adjusted<br>OR (95%CI)                                | 1                | <b>0.49</b><br>[0.29, 0.85] | <b>0.59</b><br>[0.35, 0.99] | <b>0.52</b><br>[0.30, 0.89] | <b>0.38</b><br>[0.22, 0.68] |
| MV adjusted+ <b>opt.</b> +<br><b>happy</b><br>OR (95%CI) | 1                | <b>0.53</b><br>[0.31, 0.91] | 0.64<br>[0.38, 1.07]        | <b>0.54</b><br>[0.31, 0.94] | <b>0.43</b><br>[0.24, 0.76] |
| MV adjusted + <b>activity</b><br>OR (95%CI)              | 1                | <b>0.48</b><br>[0.28, 0.83] | <b>0.58</b><br>[0.35, 0.97] | <b>0.49</b><br>[0.28, 0.85] | <b>0.37</b><br>[0.20, 0.65] |
| MV adjusted+ <b>health</b><br>OR (95%CI)                 | 1                | <b>0.52</b><br>[0.30, 0.89] | <b>0.60</b><br>[0.36, 1.01] | <b>0.55</b><br>[0.32, 0.95] | <b>0.43</b><br>[0.24, 0.77] |
| <b>Late chronotype</b>                                   |                  |                             |                             |                             |                             |
| N* (%)                                                   | 50<br>[24.6%]    | 41<br>[21.1%]               | 46<br>[22.0%]               | 36<br>[19.3%]               | 27<br>[13.6%]               |
| Age<br>OR (95%CI)                                        | 1                | 0.83<br>[0.52, 1.32]        | 0.87<br>[0.55, 1.37]        | 0.74<br>[0.45, 1.19]        | <b>0.49</b><br>[0.29, 0.82] |
| MV<br>OR (95%CI)                                         | 1                | 0.78<br>[0.48, 1.27]        | 0.87<br>[0.54, 1.40]        | 0.70<br>[0.42, 1.17]        | <b>0.49</b><br>[0.29, 0.83] |
| MV + <b>opt.</b> + <b>happy</b><br>OR (95%CI)            | 1                | 0.82<br>[0.50, 1.34]        | 0.93<br>[0.57, 1.50]        | 0.74<br>[0.44, 1.23]        | <b>0.52</b><br>[0.30, 0.90] |
| MV + <b>activity</b><br>OR (95%CI)                       | 1                | 0.85<br>[0.52, 1.40]        | 0.95<br>[0.59, 1.54]        | 0.82<br>[0.48, 1.38]        | <b>0.57</b><br>[0.33, 0.98] |
| MV + <b>health</b><br>OR (95%CI)                         | 1                | 0.81<br>[0.49, 1.33]        | 0.90<br>[0.56, 1.46]        | 0.74<br>[0.44, 1.23]        | <b>0.51</b><br>[0.30, 0.88] |

**MV:** adjusted for age, gender, education, area, workstatus, marital, kids <16 years, smoking status

**MV + opt. + happy:** adjusted for MV + optimism and happiness

**MV + activity:** adjusted for MV + daily walking and moderate and vigorous physical activity

**MV + health:** adjusted for MV + self-estimated health status

**Supplemental Table S2.** Association of time spent outdoors (TSO) in quintiles and prevalence of adverse sleep outcomes in 2020

|                                                           | TSOq1<br>0-1.00h | TSOq2<br>1.01-1.79h        | TSOq3<br>1.80-2.57h        | TSOq4<br>2.58-3.86h        | TSOq5<br>3.87-10.86h       |
|-----------------------------------------------------------|------------------|----------------------------|----------------------------|----------------------------|----------------------------|
| N (n%)                                                    | 175<br>[21.0%]   | 1163<br>[19.6%]            | 168<br>[20.2%]             | 162<br>[19.5%]             | 164<br>[19.7%]             |
| <b>Chronic Insomnia</b>                                   |                  |                            |                            |                            |                            |
| N (n%)                                                    | 36<br>[20.6%]    | 18<br>[11.0%]              | 25<br>[14.9%]              | 18<br>[11.1%]              | 12<br>[7.3%]               |
| Age adjusted<br>OR (95%CI)                                | 1                | <b>0.48</b><br>[0.26,0.89] | 0.68<br>[0.39,1.20]        | <b>0.46</b><br>[0.25,0.85] | <b>0.29</b><br>[0.15,0.59] |
| MV adjusted<br>OR (95%CI)                                 | 1                | 0.57<br>[0.30,1.07]        | 0.76<br>[0.42,1.39]        | 0.56<br>[0.29,1.09]        | <b>0.34</b><br>[0.16,0.69] |
| MV adjusted+ <b>opt.</b> +<br><b>happy</b><br>OR (95%CI)  | 1                | 0.75<br>[0.37,1.51]        | 1.03<br>[0.54,1.98]        | 0.77<br>[0.38,1.57]        | <b>0.39</b><br>[0.18,0.86] |
| MV adjusted+ <b>activity</b><br>OR (95%CI)                | 1                | 0.55<br>[0.29,1.05]        | 0.75<br>[0.41,1.37]        | 0.55<br>[0.28,1.08]        | <b>0.32</b><br>[0.15,0.68] |
| MV adjusted + <b>health</b><br>OR (95%CI)                 | 1                | 0.71<br>[0.36,1.40]        | 0.82<br>[0.43,1.56]        | 0.83<br>[0.41,1.68]        | 0.51<br>[0.24,1.10]        |
| <b>Short sleep</b>                                        |                  |                            |                            |                            |                            |
| N (%)                                                     | 41<br>[23.4%]    | 22<br>[13.5%]              | 22<br>[13.1%]              | 20<br>[12.4%]              | 21<br>[12.8%]              |
| Age adjusted<br>OR (95%CI)                                | 1                | <b>0.51</b><br>[0.28,0.90] | <b>0.48</b><br>[0.27,0.85] | <b>0.43</b><br>[0.24,0.78] | <b>0.47</b><br>[0.26,0.84] |
| MV adjusted<br>OR (95%CI)                                 | 1                | 0.61<br>[0.33,1.11]        | 0.57<br>[0.31,1.05]        | 0.54<br>[0.29,1.02]        | <b>0.52</b><br>[0.28,0.96] |
| MV adjusted + <b>opt.</b> +<br><b>happy</b><br>OR (95%CI) | 1                | 0.67<br>[0.37,1.24]        | 0.60<br>[0.32,1.12]        | 0.62<br>[0.33,1.18]        | 0.57<br>[0.30,1.06]        |
| MV adjusted + <b>activity</b><br>OR (95%CI)               | 1                | 0.66<br>[0.36,1.23]        | 0.63<br>[0.34,1.16]        | 0.61<br>[0.32,1.17]        | 0.59<br>[0.31,1.12]        |
| MV adjusted + <b>health</b><br>OR (95%CI)                 | 1                | 0.62<br>[0.34,1.15]        | 0.58<br>[0.31,1.08]        | 0.56<br>[0.29,1.06]        | 0.54<br>[0.29,1.02]        |
| <b>Late chronotype</b>                                    |                  |                            |                            |                            |                            |
| N (%)                                                     | 62<br>[35.4%]    | 32<br>[19.6%]              | 45<br>[26.8%]              | 24<br>[14.8%]              | 32<br>[19.5%]              |
| Age adjusted<br>OR (95%CI)                                | 1                | <b>0.44</b><br>[0.27,0.73] | 0.67<br>[0.42,1.06]        | <b>0.31</b><br>[0.18,0.53] | <b>0.44</b><br>[0.27,0.73] |
| MV adjusted<br>OR (95%CI)                                 | 1                | <b>0.48</b><br>[0.28,0.80] | 0.71<br>[0.43,1.16]        | <b>0.32</b><br>[0.18,0.56] | <b>0.45</b><br>[0.27,0.76] |
| MV adjusted + <b>opt.</b> +<br><b>happy</b><br>OR (95%CI) | 1                | <b>0.52</b><br>[0.31,0.89] | 0.78<br>[0.47,1.29]        | <b>0.36</b><br>[0.20,0.65] | <b>0.49</b><br>[0.29,0.84] |
| MV adjusted + <b>activity</b><br>OR (95%CI)               | 1                | <b>0.53</b><br>[0.31,0.89] | 0.79<br>[0.48,1.30]        | <b>0.37</b><br>[0.21,0.66] | <b>0.53</b><br>[0.31,0.91] |
| MV adjusted + <b>health</b><br>OR (95%CI)                 | 1                | <b>0.50</b><br>[0.30,0.84] | 0.72<br>[0.44,1.19]        | <b>0.35</b><br>[0.20,0.62] | <b>0.49</b><br>[0.29,0.85] |

**MV:** adjusted for age, gender, education, area, workstatus, marital, kids <16 years, smoking status

**MV + opt. + happy:** adjusted for MV + optimism and happiness

**MV + activity:** adjusted for MV + daily walking and moderate and vigorous physical activity

**MV + health:** adjusted for MV + self-estimated health status

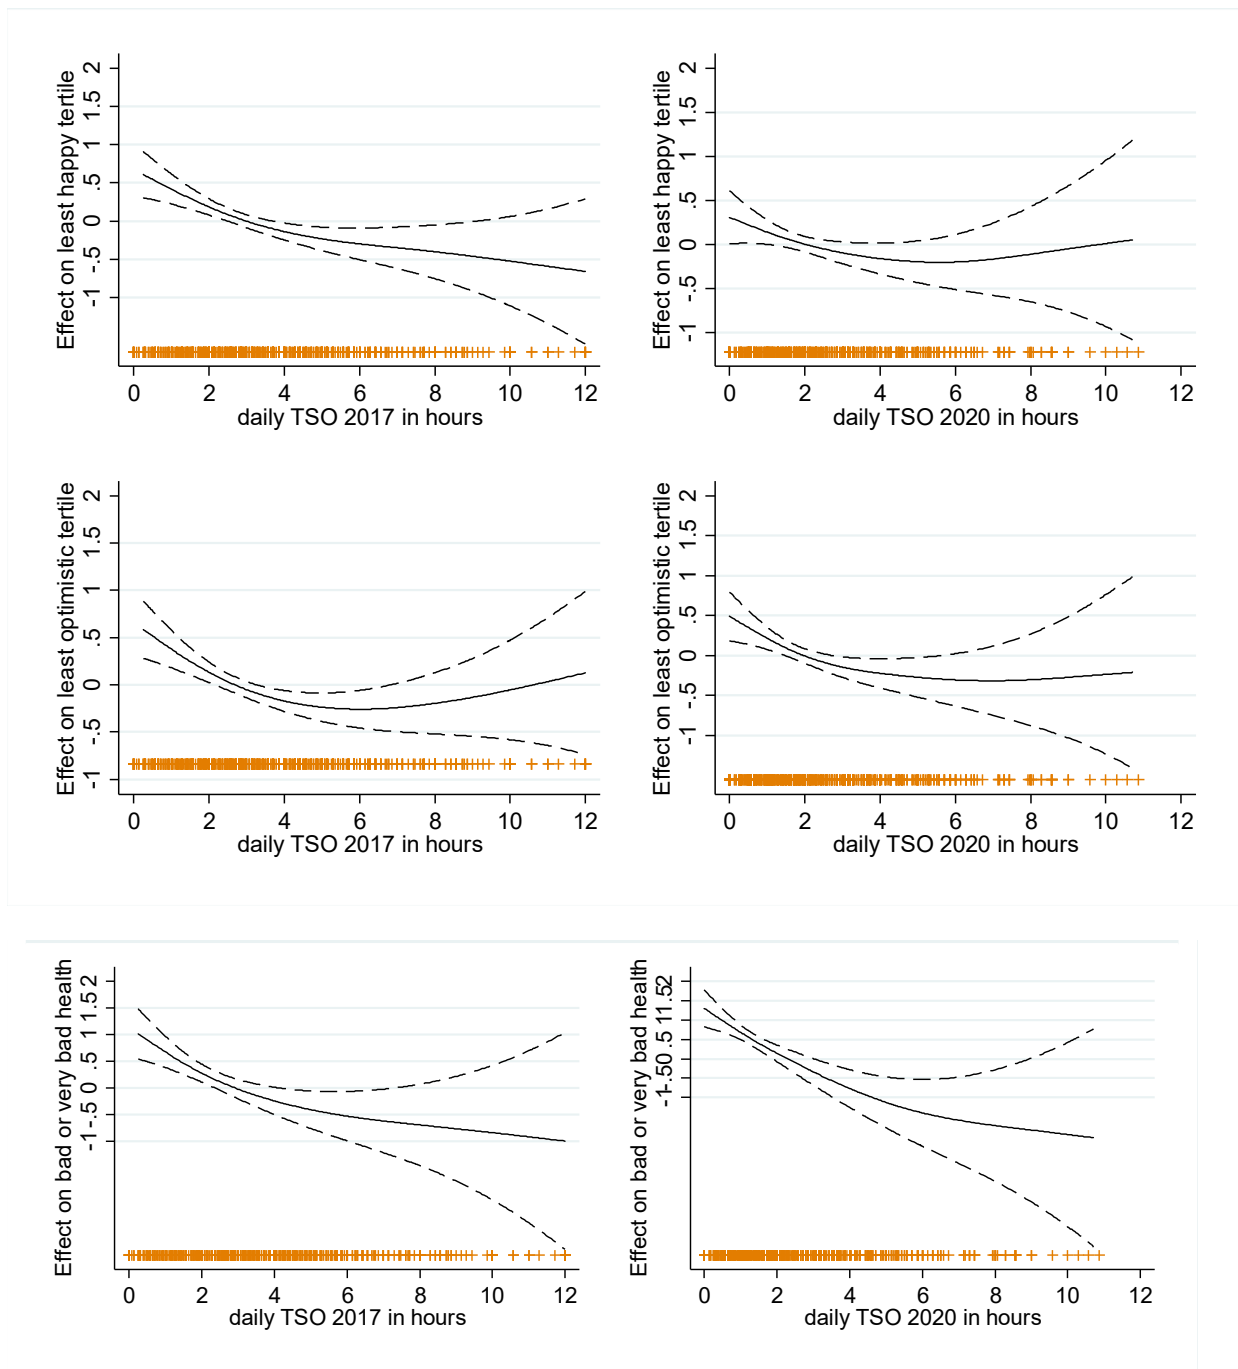

**Supplemental Figure S2.** Multivariable adjusted general additive models (GAM) splines (smooth function) for the association of time spent outdoors (hours/day) and optimism, happiness and health status in the 2017 and 2020 survey.

**Supplemental Table S3.** Association of time spent outdoors (TSO) in quintiles (hours/day) and prevalence of least happy tertile, least optimistic tertile and bad health status in 2017

|                                             | TSOq1<br>0-1.74h | TSOq2<br>1.75-2.71h        | TSOq3<br>2.72-3.71h        | TSOq4<br>3.72-5.11h        | TSOq5<br>5.12-12h          |
|---------------------------------------------|------------------|----------------------------|----------------------------|----------------------------|----------------------------|
| N (n%)                                      | 203<br>[20.5%]   | 194<br>[19.6%]             | 209<br>[21.1%]             | 187<br>[18.8%]             | 198<br>[20.0%]             |
| <b>Least happy tertile</b>                  |                  |                            |                            |                            |                            |
| N (n%)                                      | 95<br>[46.8%]    | 67<br>[34.5%]              | 62<br>[29.7%]              | 63<br>[33.7%]              | 55<br>[27.2%]              |
| Age adjusted<br>OR (95%CI)                  | 1                | <b>0.63</b><br>[0.42,0.95] | <b>0.50</b><br>[0.33,0.75] | <b>0.61</b><br>[0.41,0.93] | <b>0.47</b><br>[0.31,0.72] |
| MV adjusted<br>OR (95%CI)                   | 1                | <b>0.64</b><br>[0.42,0.98] | <b>0.50</b><br>[0.33,0.76] | <b>0.62</b><br>[0.40,0.94] | <b>0.45</b><br>[0.29,0.69] |
| MV adjusted + <b>opt.</b><br>OR (95%CI)     | 1                | 0.81<br>[0.48,1.35]        | <b>0.59</b><br>[0.35,0.98] | 0.71<br>[0.42,1.20]        | 0.61<br>[0.36,1.03]        |
| MV adjusted + <b>activity</b><br>OR (95%CI) | 1                | 0.67<br>[0.44,1.03]        | <b>0.51</b><br>[0.33,0.77] | <b>0.65</b><br>[0.42,1.00] | <b>0.47</b><br>[0.30,0.73] |
| MV adjusted + <b>health</b><br>OR (95%CI)   | 1                | 0.72<br>[0.46,1.11]        | <b>0.52</b><br>[0.34,0.81] | 0.70<br>[0.45,1.09]        | <b>0.53</b><br>[0.34,0.83] |
| <b>Least optimistic tertile</b>             |                  |                            |                            |                            |                            |
| N (%)                                       | 100<br>[49.3%]   | 65<br>[33.5%]              | 68<br>[32.5%]              | 64<br>[34.2%]              | 62<br>[31.3%]              |
| Age adjusted<br>OR (95%CI)                  | 1                | <b>0.54</b><br>[0.36,0.82] | <b>0.51</b><br>[0.34,0.77] | <b>0.57</b><br>[0.37,0.86] | <b>0.51</b><br>[0.34,0.77] |
| MV adjusted<br>OR (95%CI)                   | 1                | <b>0.58</b><br>[0.38,0.88] | <b>0.54</b><br>[0.36,0.83] | <b>0.57</b><br>[0.37,0.87] | <b>0.48</b><br>[0.32,0.74] |
| MV adjusted + <b>happy</b><br>OR (95%CI)    | 1                | 0.63<br>[0.38,1.06]        | 0.71<br>[0.43,1.19]        | 0.67<br>[0.40,1.13]        | 0.67<br>[0.40,1.12]        |
| MV adjusted + <b>activity</b><br>OR (95%CI) | 1                | <b>0.57</b><br>[0.37,0.87] | <b>0.53</b><br>[0.35,0.80] | <b>0.54</b><br>[0.35,0.83] | <b>0.45</b><br>[0.29,0.69] |
| MV adjusted + <b>health</b><br>OR (95%CI)   | 1                | <b>0.63</b><br>[0.41,0.97] | <b>0.58</b><br>[0.38,0.88] | <b>0.63</b><br>[0.41,0.98] | <b>0.56</b><br>[0.36,0.86] |
| <b>Bad or very bad health status</b>        |                  |                            |                            |                            |                            |
| N (%)                                       | 23<br>[11.3%]    | 10<br>[5.2%]               | 13<br>[6.2%]               | 8<br>[4.3%]                | 10<br>[5.1%]               |
| Age adjusted<br>OR (95%CI)                  | 1                | <b>0.40</b><br>[0.18,0.86] | 0.49<br>[0.24,1.00]        | <b>0.32</b><br>[0.14,0.74] | <b>0.37</b><br>[0.17,0.81] |
| MV adjusted<br>OR (95%CI)                   | 1                | <b>0.37</b><br>[0.16,0.83] | <b>0.47</b><br>[0.22,0.99] | <b>0.30</b><br>[0.13,0.72] | <b>0.34</b><br>[0.15,0.76] |
| MV adjusted + <b>happy</b><br>OR (95%CI)    | 1                | 0.47<br>[0.21,1.08]        | 0.61<br>[0.28,1.34]        | <b>0.37</b><br>[0.15,0.91] | <b>0.40</b><br>[0.17,0.94] |
| MV adjusted+ <b>opt.</b><br>OR (95%CI)      | 1                | 0.50<br>[0.22,1.17]        | 0.63<br>[0.28,1.40]        | <b>0.34</b><br>[0.13,0.86] | <b>0.40</b><br>[0.17,0.96] |
| MV adjusted + <b>activity</b><br>OR (95%CI) | 1                | <b>0.40</b><br>[0.18,0.91] | 0.48<br>[0.22,1.02]        | <b>0.31</b><br>[0.13,0.75] | <b>0.37</b><br>[0.16,0.85] |

**MV:** adjusted for age, gender, education, area, workstatus, marital, kids <16 years, smoking status, optimism index

**MV + opt. + happy:** adjusted for MV + optimism and happiness

**MV + activity:** adjusted for MV + daily walking and moderate and vigorous physical activity

**MV + health:** adjusted for MV + self-estimated health status

**Supplemental Table S4.** Association of time spent outdoors (TSO) in quintiles and prevalence of least happy tertile, least optimistic tertile and bad health status in 2020

|                                            | TSOq1<br>0-1.74h | TSOq2<br>1.75-2.71h        | TSOq3<br>2.72-3.71h        | TSOq4<br>3.72-5.11h        | TSOq5<br>5.12-12h          |
|--------------------------------------------|------------------|----------------------------|----------------------------|----------------------------|----------------------------|
| N (n%)                                     | 175<br>[21.0%]   | 1163<br>[19.6%]            | 168<br>[20.2%]             | 162<br>[19.5%]             | 164<br>[19.7%]             |
| <b>Least happy tertile</b>                 |                  |                            |                            |                            |                            |
| N (n%)                                     | 91<br>[52.0%]    | 63<br>[38.7%]              | 71<br>[42.3%]              | 60<br>[37.0%]              | 61<br>[37.2%]              |
| Age adjusted<br>OR (95%CI)                 | 1                | <b>0.57</b><br>[0.37,0.89] | 0.66<br>[0.43,1.02]        | <b>0.56</b><br>[0.36,0.87] | <b>0.58</b><br>[0.37,0.90] |
| MV adjusted<br>OR (95%CI)                  | 1                | <b>0.61</b><br>[0.39,0.95] | 0.72<br>[0.46,1.13]        | <b>0.59</b><br>[0.37,0.93] | <b>0.61</b><br>[0.38,0.96] |
| MV adjusted+ <b>opt.</b><br>OR (95%CI)     | 1                | 0.80<br>[0.46,1.41]        | 0.96<br>[0.55,1.66]        | 0.83<br>[0.47,1.47]        | 0.68<br>[0.39,1.21]        |
| MV adjusted+ <b>activity</b><br>OR (95%CI) | 1                | 0.65<br>[0.41,1.03]        | 0.77<br>[0.49,1.22]        | 0.65<br>[0.41,1.05]        | 0.68<br>[0.42,1.09]        |
| MV adjusted+ <b>health</b><br>OR (95%CI)   | 1                | 0.67<br>[0.42,1.07]        | 0.75<br>[0.47,1.19]        | 0.72<br>[0.45,1.17]        | 0.74<br>[0.46,1.19]        |
| <b>Least optimistic tertile</b>            |                  |                            |                            |                            |                            |
| N (%)                                      | 98<br>[56.0%]    | 55<br>[33.7%]              | 62<br>[36.9%]              | 51<br>[31.5%]              | 59<br>[36.0%]              |
| Age adjusted<br>OR (95%CI)                 | 1                | <b>0.40</b><br>[0.25,0.62] | <b>0.47</b><br>[0.30,0.72] | <b>0.38</b><br>[0.24,0.59] | <b>0.47</b><br>[0.30,0.73] |
| MV adjusted<br>OR (95%CI)                  | 1                | <b>0.42</b><br>[0.26,0.67] | <b>0.50</b><br>[0.32,0.80] | <b>0.40</b><br>[0.25,0.65] | <b>0.51</b><br>[0.32,0.82] |
| MV adjusted + <b>happy</b><br>OR (95%CI)   | 1                | <b>0.50</b><br>[0.29,0.87] | <b>0.53</b><br>[0.31,0.91] | <b>0.46</b><br>[0.26,0.81] | 0.60<br>[0.35,1.05]        |
| MV adjusted+ <b>activity</b><br>OR (95%CI) | 1                | <b>0.45</b><br>[0.28,0.73] | <b>0.54</b><br>[0.34,0.86] | <b>0.45</b><br>[0.28,0.74] | <b>0.58</b><br>[0.36,0.94] |
| MV adjusted+ <b>health</b><br>OR (95%CI)   | 1                | <b>0.46</b><br>[0.28,0.74] | <b>0.51</b><br>[0.31,0.82] | <b>0.49</b><br>[0.30,0.81] | 0.62<br>[0.38,1.01]        |
| <b>Bad or very bad health status</b>       |                  |                            |                            |                            |                            |
| N (%)                                      |                  |                            |                            |                            |                            |
| Age adjusted<br>OR (95%CI)                 | 1                | <b>0.33</b><br>[0.14,0.78] | <b>0.46</b><br>[0.21,0.98] | <b>0.21</b><br>[0.08,0.55] | <b>0.10</b><br>[0.03,0.35] |
| MV adjusted<br>OR (95%CI)                  | 1                | 0.42<br>[0.17,1.05]        | 0.66<br>[0.29,1.54]        | <b>0.26</b><br>[0.09,0.74] | <b>0.10</b><br>[0.03,0.36] |
| MV adjusted + <b>happy</b><br>OR (95%CI)   | 1                | 0.52<br>[0.20,1.34]        | 0.76<br>[0.31,1.83]        | <b>0.28</b><br>[0.10,0.82] | <b>0.11</b><br>[0.03,0.41] |
| MV adjusted+ <b>opt.</b><br>OR (95%CI)     | 1                | 0.47<br>[0.17,1.29]        | 0.88<br>[0.35,2.16]        | <b>0.30</b><br>[0.10,0.92] | <b>0.08</b><br>[0.02,0.33] |
| MV adjusted+ <b>activity</b><br>OR (95%CI) | 1                | 0.46<br>[0.18,1.17]        | 0.72<br>[0.30,1.70]        | 0.31<br>[0.11,0.89]        | 0.11<br>[0.03,0.41]        |

**MV:** adjusted for age, gender, education, area, workstatus, marital, kids <16 years, smoking status

**MV + opt. + happy:** adjusted for MV + optimism and happiness

**MV + activity:** adjusted for MV + daily walking and moderate and vigorous physical activity

**MV + health:** adjusted for MV + self-estimated health status

**Supplemental Table S5.** Association of time spent outdoors (TSO) (hours/day) and prevalence of all outcomes in 2017 and 2020 stratified by sex.

|                                      | TSO-2017 continuous<br>Per units increase |                    |                         | TSO-2020 continuous<br>Per units increase |                    |                    |
|--------------------------------------|-------------------------------------------|--------------------|-------------------------|-------------------------------------------|--------------------|--------------------|
|                                      | Total                                     | Female             | Male                    | Total                                     | Female             | Male               |
| <b>N(n%)</b>                         | 991                                       | 504 [50.9%]        | 487 [49.1%]             | 832                                       | 417 [50.1%]        | 415 [49.9%]        |
| <b>Chronic Insomnia</b>              |                                           |                    |                         |                                           |                    |                    |
| MV                                   | 1.01                                      | 1.08               | 0.96                    | <b>0.82</b>                               | 0.88               | <b>0.73</b>        |
| OR (95%CI)                           | [0.92-1.11]                               | [0.94-1.24]        | [0.84-1.10]             | <b>[0.71-0.94]</b>                        | [0.74,1.06]        | <b>[0.58-0.92]</b> |
| Interaction (p-value)                | 0.734                                     |                    |                         | 0.497                                     |                    |                    |
| <b>Short sleep</b>                   |                                           |                    |                         |                                           |                    |                    |
| MV                                   | <b>0.88</b>                               | 0.80               | 0.94                    | <b>0.89</b>                               | 0.89               | 0.88               |
| OR (95%CI)                           | <b>[0.80-0.96]</b>                        | [0.68-0.93]        | [0.84-1.05]             | <b>[0.79-1.00]</b>                        | [0.73,1.08]        | [0.76-1.02]        |
| Interaction (p-value)                | 0.073                                     |                    |                         | 0.568                                     |                    |                    |
| <b>Late chronotype</b>               |                                           |                    |                         |                                           |                    |                    |
| MV                                   | <b>0.87</b>                               | 0.98               | <b>0.77</b>             | <b>0.87</b>                               | <b>0.82</b>        | 0.91               |
| OR (95%CI)                           | <b>[0.80-0.95]</b>                        | [0.87-1.10]        | <b>[0.68-0.88]</b>      | <b>[0.79-0.96]</b>                        | <b>[0.69,0.96]</b> | [0.80-1.04]        |
| Interaction (p-value)                | <b>0.038</b>                              |                    |                         | 0.307                                     |                    |                    |
| <b>Least happiness tertile</b>       |                                           |                    |                         |                                           |                    |                    |
| MV                                   | <b>0.88</b>                               | <b>0.86</b>        | <b>0.89</b>             | 0.94                                      | 1.02               | <b>0.87</b>        |
| OR (95%CI)                           | <b>[0.83-0.95]</b>                        | <b>[0.78-0.96]</b> | <b>[0.81-0.97]</b>      | [0.87-1.02]                               | [0.91,1.15]        | <b>[0.77-0.97]</b> |
| Interaction (p-value)                | 0.644                                     |                    |                         | 0.165                                     |                    |                    |
| <b>Least optimism tertile</b>        |                                           |                    |                         |                                           |                    |                    |
| MV                                   | <b>0.92</b>                               | <b>0.89</b>        | 0.95                    | <b>0.90</b>                               | 0.93               | <b>0.86</b>        |
| OR (95%CI)                           | <b>[0.87-0.98]</b>                        | <b>[0.80-0.98]</b> | [0.88-1.04]             | <b>[0.83-0.98]</b>                        | [0.82-1.05]        | <b>[0.76-0.97]</b> |
| Interaction (p-value)                | 0.30                                      |                    |                         | 0.822                                     |                    |                    |
| <b>Bad or very bad health status</b> |                                           |                    |                         |                                           |                    |                    |
| MV                                   | <b>0.80</b>                               | <b>0.70</b>        | 0.84                    | <b>0.62</b>                               | <b>0.72</b>        | 0.47               |
| OR (95%CI)                           | <b>[0.69-0.92]</b>                        | <b>[0.55-0.91]</b> | [0.70-1.00]<br>P=0.0055 | <b>[0.48-0.79]</b>                        | <b>[0.52-0.99]</b> | [0.32-0.71]        |
| Interaction (p-value)                | 0.067                                     |                    |                         | 0.776                                     |                    |                    |

**MV:** adjusted for age, gender, education, area, workstatus, marital, kids <16 years, smoking status

**MV + opt. + happy:** adjusted for MV + optimism and happiness

**MV + activity:** adjusted for MV + daily walking and moderate and vigorous physical activity

**MV + health:** adjusted for MV + self-estimated health status
